# Supplementary material
Source: publisher figshare collection journal article supplement (https://acs.figshare.com/ndownloader/files/3914686)
Supplement: Supplementary file 1 [file 3914686]

## **Supporting Information**

Organic Cations Templated Synthesis of three

Zinc–2,5-thiophenedicarboxylate Frameworks for Selective Gas Sorption

Yan-Ping He, Yan-Xi Tan and Jian Zhang\*

State Key Laboratory of Structural Chemistry, Fujian Institute of Research on the  
Structure of Matter, Chinese Academy of Sciences, Fuzhou, Fujian 350002, P. R.

China.

E-mail: zhj@fjirsm.ac.cn

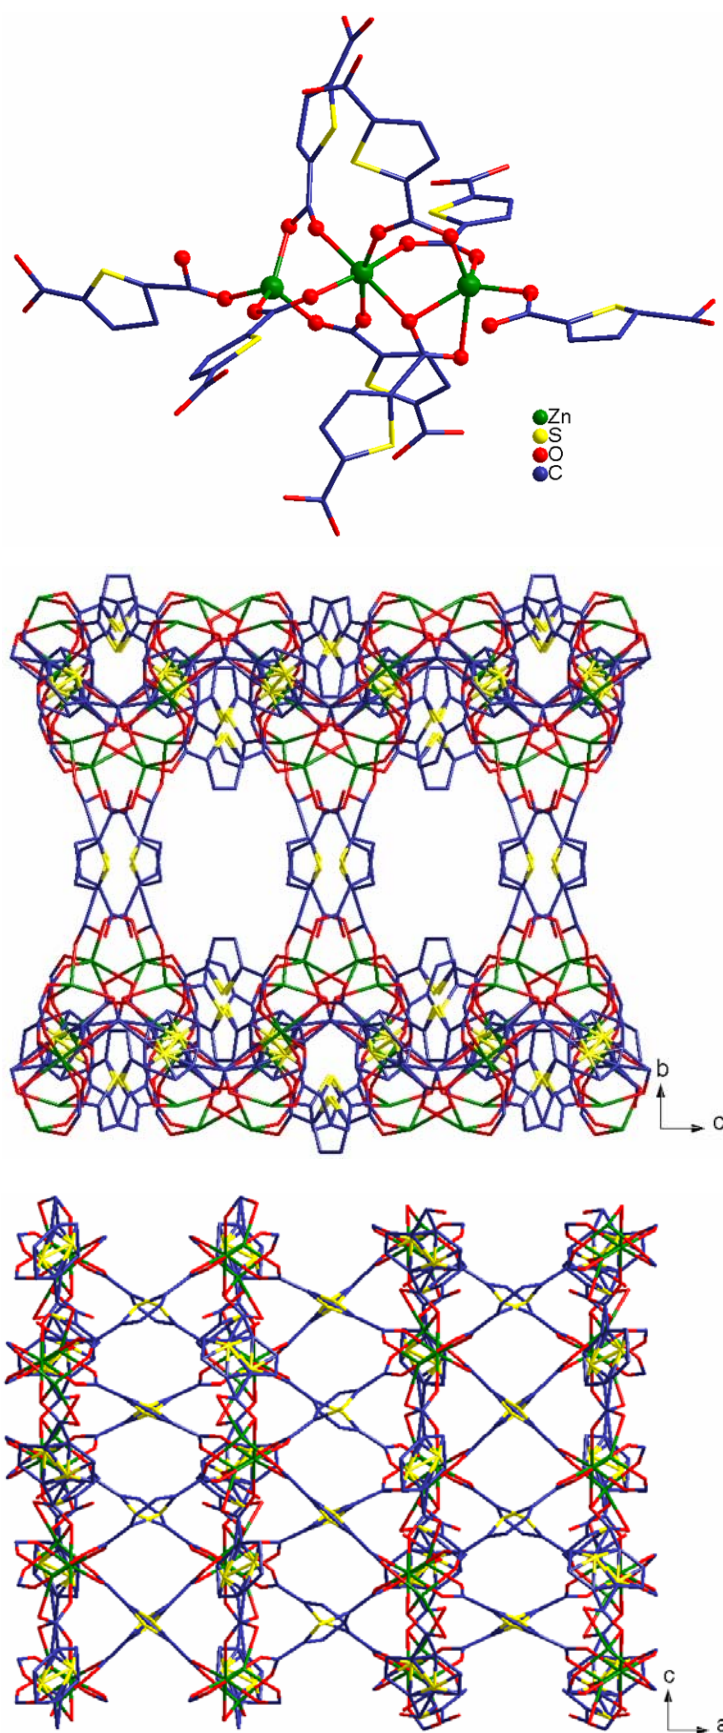

**Figure S1.** The coordination environment of  $\text{Zn}^{2+}$  ions in **1** and a view of 3D structure from *a* and *b* directions.

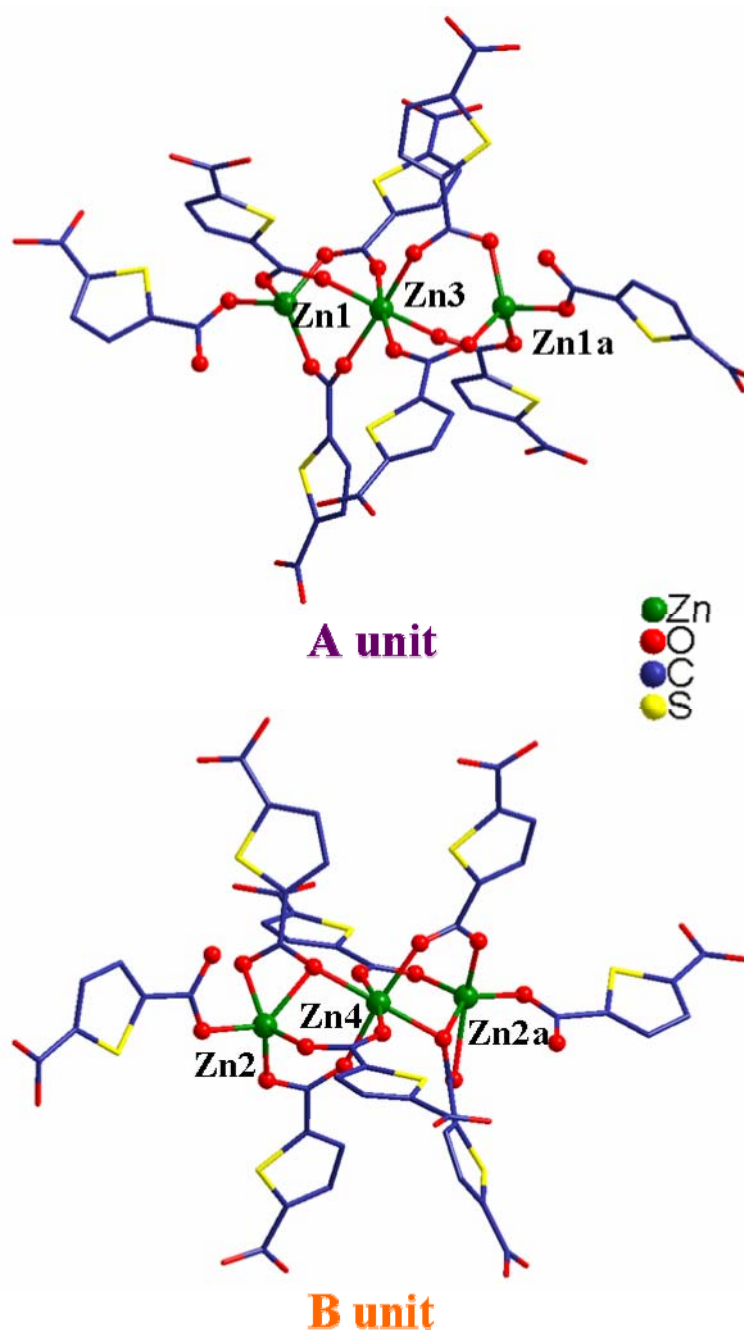

**Figure S2.** The A unit and B unit in **2**.

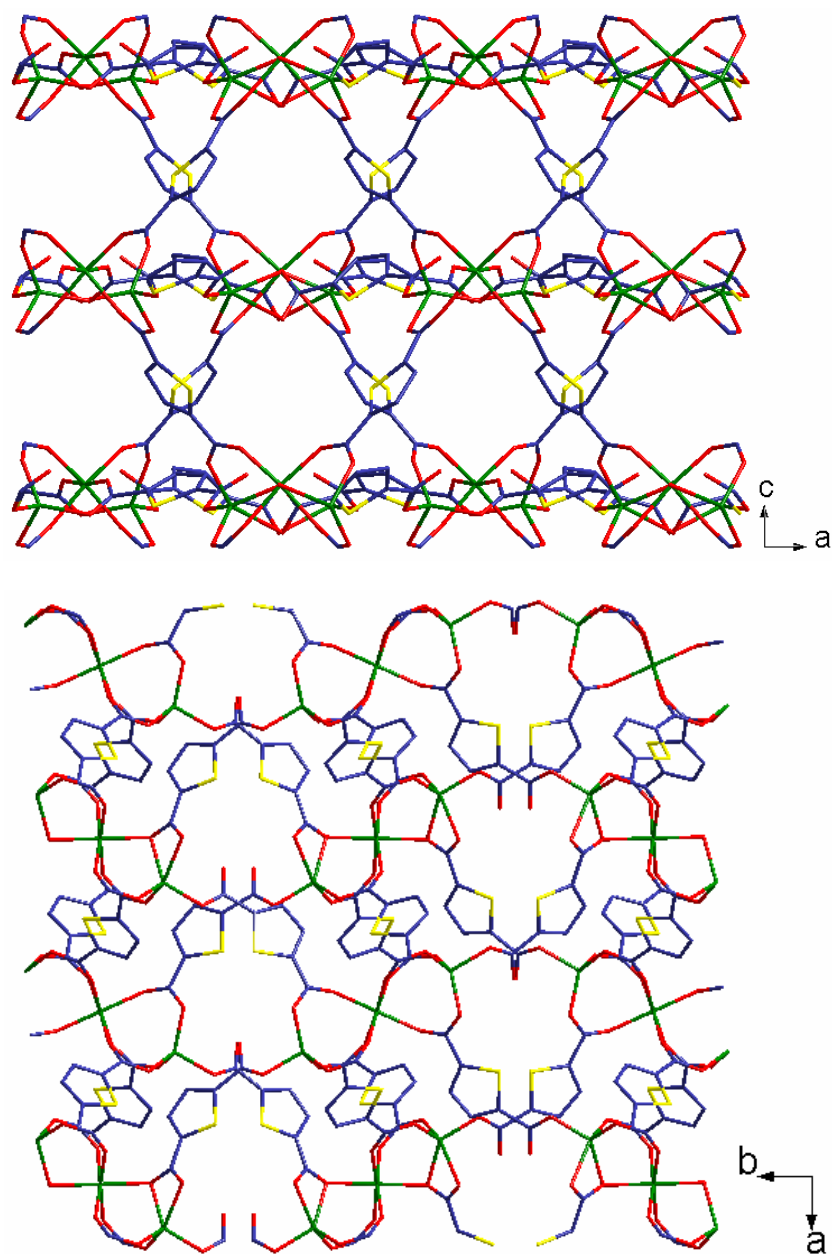

**Figure S3.** A view of 3D structure of **2** from b and c directions.

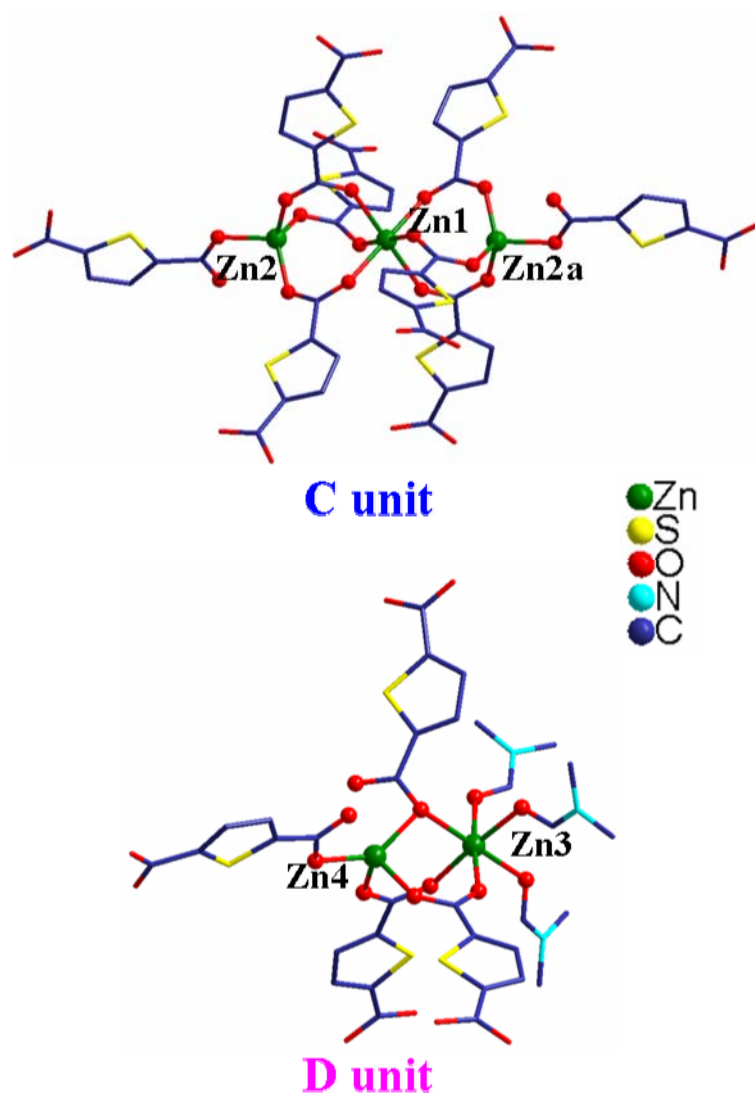

**Figure S4.** The C unit and D unit in **3**.

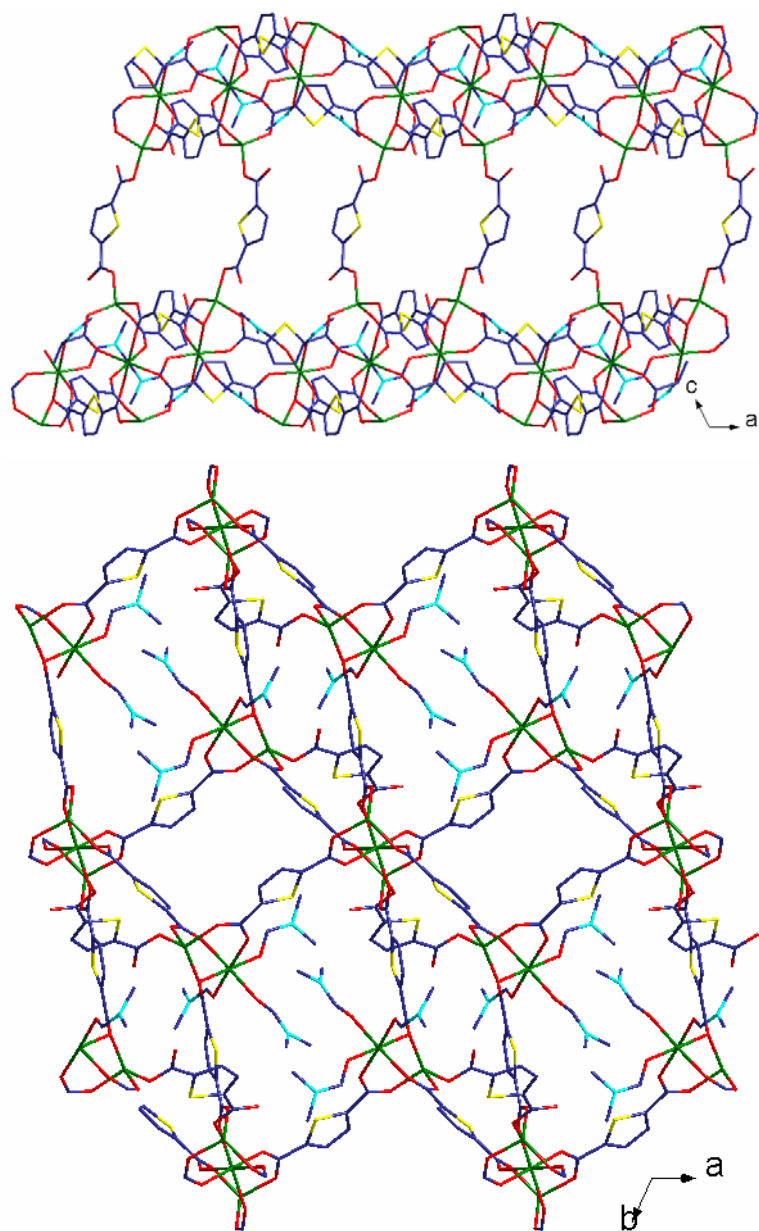

**Figure S5.** A view of 3D structure of **3** from b and c directions.

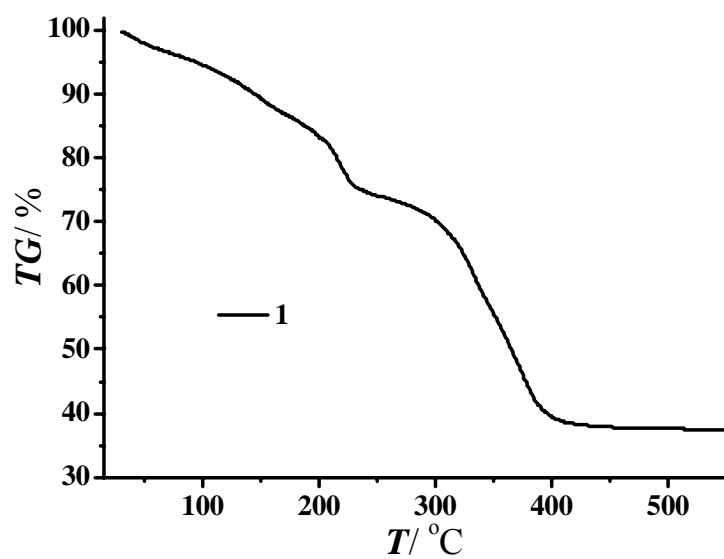

**Figure S6.** TGA curve of **1**.

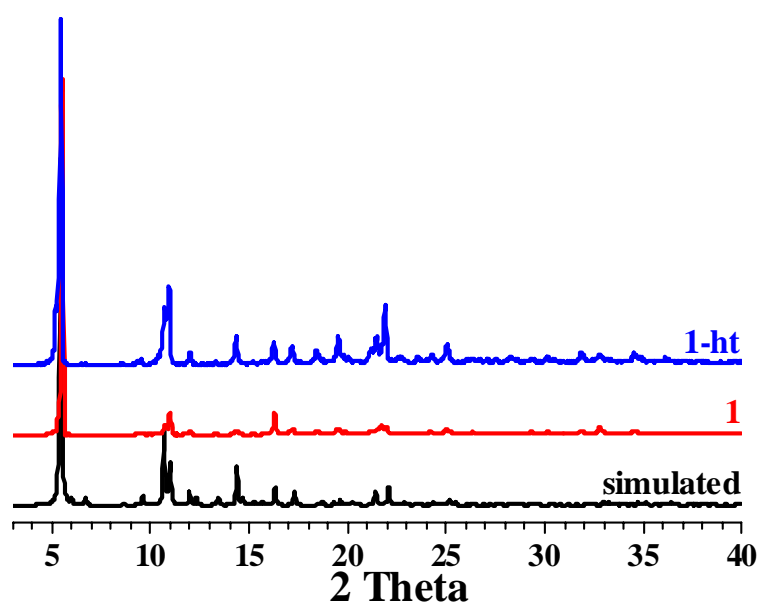

**Figure S7.** PXRD patterns of simulated from the single-crystal data of **1** (black); as-synthesized **1** (red); desolvated solid **1-ht** (blue).

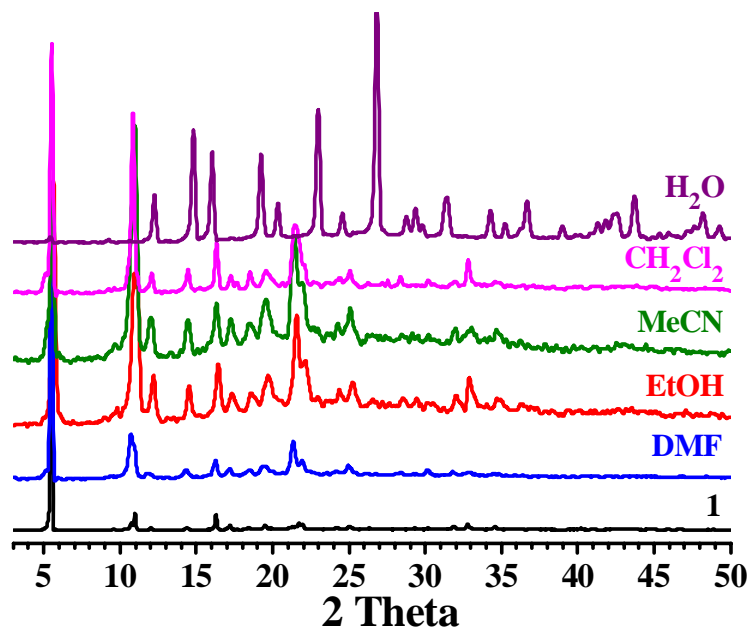

**Figure S8.** PXRD patterns of **1** and **1** in different solvents such as DMF, EtOH, MeCN, CH<sub>2</sub>Cl<sub>2</sub>, H<sub>2</sub>O.

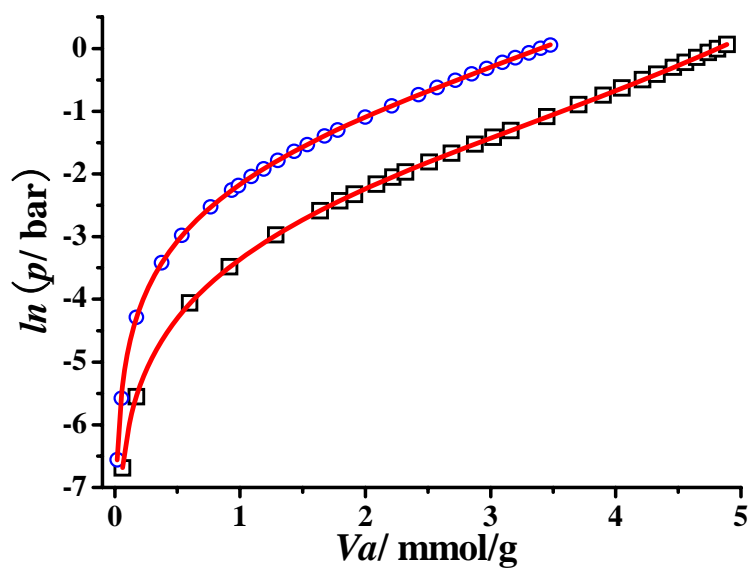

**Figure S9.** H<sub>2</sub> adsorption isotherms for **1-ht** fitting by virial method.



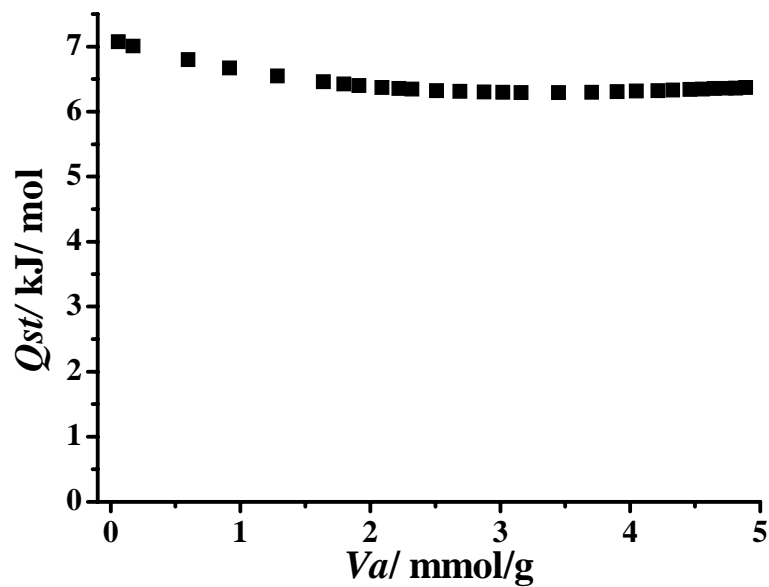

**Figure S10.** The isosteric heat of H<sub>2</sub> adsorption for **1-hf** estimated by the virial equation.

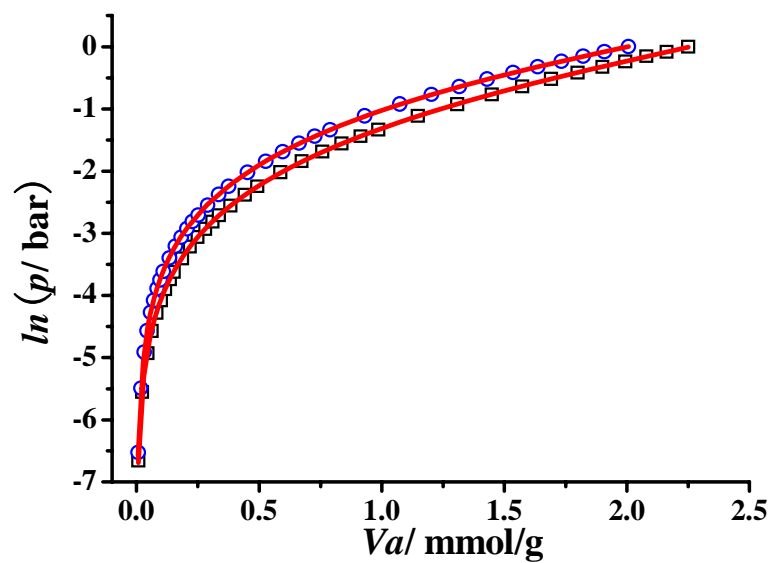

**Figure S11.** CO<sub>2</sub> adsorption isotherms for **1-hf** fitting by virial method.

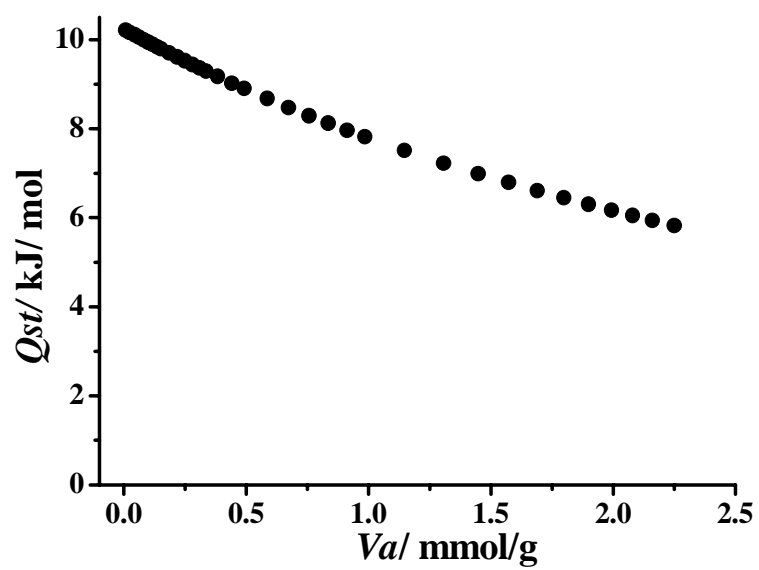

**Figure S12.** The isosteric heat of CO<sub>2</sub> adsorption for **1-ht** estimated by the virial equation.
